# Supplementary material for: The Effect of Piceatannol from Passion Fruit (Passiflora edulis) Seeds on Metabolic Health in Humans
Source: MDPI journal article supplement (doi:10.3390/nu9101142), 2017-10-18
Supplement: s1 [file s1]

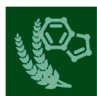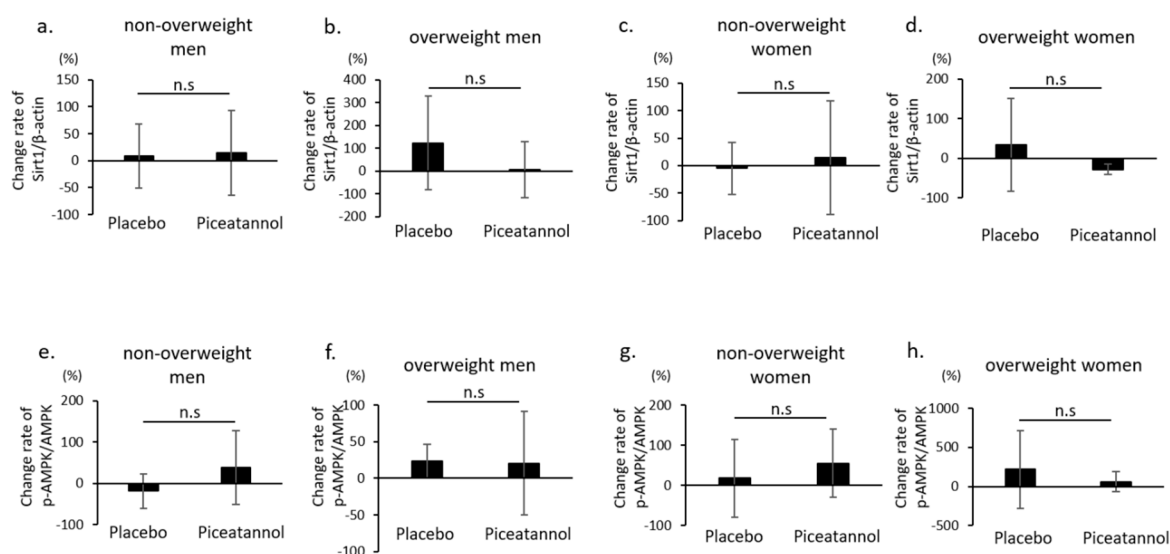

**Figure S1.** The graphs show the change rate of Sirt1/β-actin and phospho(p)-AMPK/AMPK in isolated peripheral mononuclear cells for 8 weeks of intervention, which were evaluated by western blotting (a and b: Sirt1/β-actin, e and f: p-AMPK/AMPK in non-overweight or overweight men. c and d: Sirt1/β-actin, g and h: p-AMPK/AMPK in non-overweight or overweight women). The data are presented as the mean ± S.D. n.s. denotes no significance.

**Table S1.** Data of the visual analogue scale (VAS) and the Profile of Mood States (POMS), including scores of ‘tension’, ‘depression’, ‘anger’, ‘fatigue’, ‘confusion’ and ‘vigour’ and total mood disturbance score at baseline and after 8 weeks of placebo or piceatannol supplementation (a: men, b: women).

| a.            | Men            |            |        |            |            |        |            |                   |        |            |            |        |            |            |
|---------------|----------------|------------|--------|------------|------------|--------|------------|-------------------|--------|------------|------------|--------|------------|------------|
|               | Non-overweight |            |        |            |            |        |            | Overweight        |        |            |            |        |            |            |
|               | Placebo (n=5)  |            |        |            |            |        |            | Piceatannol (n=5) |        |            |            |        |            |            |
|               | 0w             | 8w         | p      | 0w         | 8w         | p      | 0w         | 8w                | p      | 0w         | 8w         | p      | 0w         | 8w         |
| VAS (cm)      | 3.0±1.9        | 4.9±2.2    | 0.6250 | 3.1±1.4    | 4.1±1.7    | 0.8750 | 4.5±2.2    | 4.5±2.4           | 1.0000 | 2.9±0.9    | 3.2±1.7    | 0.4375 | 4.3±0.9    | 4.2±1.7    |
| POMS- Tension | 43.0±9.1       | 46.0±9.8   | 0.8125 | 39.4±10.5  | 39.3±5.5   | 1.0000 | 44.3±12.4  | 41.1±9.6          | 0.2500 | 41.6±4.2   | 42.6±3.8   | 0.8750 | 41.6±4.2   | 42.6±3.8   |
| -Depression   | 47.6±7.7       | 47.5±7.2   | 0.8750 | 40.7±1.6   | 42.4±4.0   | 0.5000 | 47.1±9.2   | 48.1±11.1         | 0.7500 | 43.9±2.1   | 45.8±5.3   | 0.3750 | 43.9±2.1   | 45.8±5.3   |
| -Anger        | 44.5±7.9       | 43.9±6.7   | 1.0000 | 40.3±4.7   | 41.9±3.0   | 0.3750 | 46.2±4.5   | 45.7±7.8          | 0.7500 | 42.1±5.3   | 44.2±4.9   | 0.2500 | 42.1±5.3   | 44.2±4.9   |
| -Vigour       | 43.6±10.6      | 47.9±11.4  | 0.5000 | 49.6±6.1   | 51.1±4.0   | 0.5000 | 54.9±9.5   | 46.6±9.9          | 0.1875 | 49.8±9.5   | 46.5±8.5   | 0.4375 | 49.8±9.5   | 46.5±8.5   |
| -Fatigue      | 47.3±8.9       | 46.5±6.9   | 0.8750 | 39.9±7.4   | 42.1±5.7   | 0.8750 | 50.9±13.1  | 49.5±11.8         | 0.6875 | 46.1±7.4   | 48.6±7.9   | 0.6250 | 46.1±7.4   | 48.6±7.9   |
| -Confusion    | 49.1±6.3       | 46.4±7.2   | 0.5000 | 41.8±4.6   | 41.3±4.4   | 1.0000 | 42.2±9.5   | 46.2±6.5          | 0.3750 | 44.7±4.0   | 45.9±6.4   | 0.5000 | 44.7±4.0   | 45.9±6.4   |
| Total         | 187.9±28.2     | 182.4±40.5 | 1.0000 | 152.6±28.6 | 155.9±20.5 | 0.8125 | 175.8±48.2 | 184.1±46.8        | 0.6250 | 168.6±23.1 | 180.6±28.0 | 0.1875 | 168.6±23.1 | 180.6±28.0 |
| b.            | Women          |            |        |            |            |        |            |                   |        |            |            |        |            |            |
|               | Non-overweight |            |        |            |            |        |            | Overweight        |        |            |            |        |            |            |
|               | Placebo (n=5)  |            |        |            |            |        |            | Piceatannol (n=5) |        |            |            |        |            |            |
|               | 0w             | 8w         | p      | 0w         | 8w         | p      | 0w         | 8w                | p      | 0w         | 8w         | p      | 0w         | 8w         |
| VAS (cm)      | 3.2±1.5        | 4.4±2.3    | 0.3125 | 2.6±0.7    | 2.6±1.1    | 1.0000 | 3.1±2.0    | 2.0±1.5           | 0.2500 | 4.3±2.0    | 4.1±2.1    | 1.0000 | 4.3±2.0    | 4.1±2.1    |
| POMS- Tension | 41.1±6.2       | 39.5±4.9   | 0.5000 | 42.6±7.9   | 41.4±7.2   | 0.8125 | 44.0±7.0   | 46.3±4.6          | 0.5000 | 51.2±7.2   | 52.4±12.0  | 1.0000 | 51.2±7.2   | 52.4±12.0  |
| -Depression   | 43.1±4.1       | 41.9±4.3   | 0.7500 | 48.9±8.1   | 47.3±11.0  | 0.6250 | 48.3±9.3   | 48.3±5.9          | 1.0000 | 48.0±8.6   | 48.4±7.9   | 1.0000 | 48.0±8.6   | 48.4±7.9   |
| -Anger        | 45.6±7.5       | 46.8±7.7   | 0.7500 | 47.4±8.5   | 49.5±5.7   | 0.6250 | 44.3±8.3   | 44.3±6.4          | 1.0000 | 50.4±13.6  | 47.3±10.5  | 0.2500 | 50.4±13.6  | 47.3±10.5  |
| -Vigour       | 44.0±9.9       | 43.0±10.1  | 1.0000 | 40.4±9.9   | 40.9±7.9   | 0.7500 | 41.6±4.2   | 45.2±8.6          | 0.5000 | 43.4±3.6   | 42.4±4.2   | 0.5000 | 43.4±3.6   | 42.4±4.2   |
| -Fatigue      | 45.8±1.7       | 46.5±4.2   | 0.6875 | 46.1±10.3  | 44.6±4.8   | 1.0000 | 45.1±8.8   | 45.7±7.2          | 1.0000 | 51.6±10.6  | 54.9±14.3  | 0.6250 | 51.6±10.6  | 54.9±14.3  |
| -Confusion    | 53.0±2.5       | 51.7±4.2   | 1.0000 | 51.8±5.6   | 50.9±7.5   | 0.9375 | 52.0±4.5   | 56.1±5.3          | 0.5000 | 62.7±10.7  | 62.9±15.1  | 1.0000 | 62.7±10.7  | 62.9±15.1  |
| Total         | 3.2±1.5        | 4.4±2.3    | 0.3125 | 2.6±0.7    | 2.6±1.1    | 1.0000 | 3.1±2.0    | 2.0±1.5           | 0.2500 | 4.3±2.0    | 4.1±2.1    | 1.0000 | 4.3±2.0    | 4.1±2.1    |

**Table S2.** Adverse events during the intervention.

| Adverse events                          | Placebo (n=19) |          | Piceatannol (n=20) |          | $\chi^2$<br>(p value) |
|-----------------------------------------|----------------|----------|--------------------|----------|-----------------------|
|                                         | n              | n (%)    | n                  | n (%)    |                       |
| Total                                   | 9              | 7(36.8%) | 11                 | 7(35.0%) | 1.0000                |
| Constipation                            | 1              | 1(5.3%)  | 1                  | 1(5.0%)  | 1.0000                |
| Peripheral edema                        | 0              | 0(0.0%)  | 1                  | 1(5.0%)  | 1.0000                |
| Liver dysfunction                       | 0              | 0(0.0%)  | 1                  | 1(5.0%)  | 1.0000                |
| Seasonal allergy                        | 1              | 1(5.3%)  | 0                  | 0(0.0%)  | 0.9793                |
| Gastroenteritis                         | 2              | 2(10.5%) | 1                  | 1(5.0%)  | 0.9631                |
| Viral upper respiratory tract infection | 4              | 4(21.1%) | 1                  | 1(5.0%)  | 0.3079                |
| influenza                               | 0              | 0(0.0%)  | 1                  | 1(5.0%)  | 1.0000                |
| Contusion                               | 0              | 0(0.0%)  | 1                  | 1(5.0%)  | 1.0000                |
| Dyslipidemia                            | 0              | 0(0.0%)  | 1                  | 1(5.0%)  | 1.0000                |
| Hyperuricemia                           | 1              | 1(5.3%)  | 1                  | 1(5.0%)  | 1.0000                |
| Numbness                                | 0              | 0(0.0%)  | 2                  | 1(5.0%)  | 1.0000                |
